# Supplementary material
Source: PubMed Central journal article supplement (PMC6927800)
Supplement: EMS84642-supplement-1.pdf [file EMS84642-supplement-1.pdf]

**Intracellular offsprings released from SFB filaments  
are flagellated**

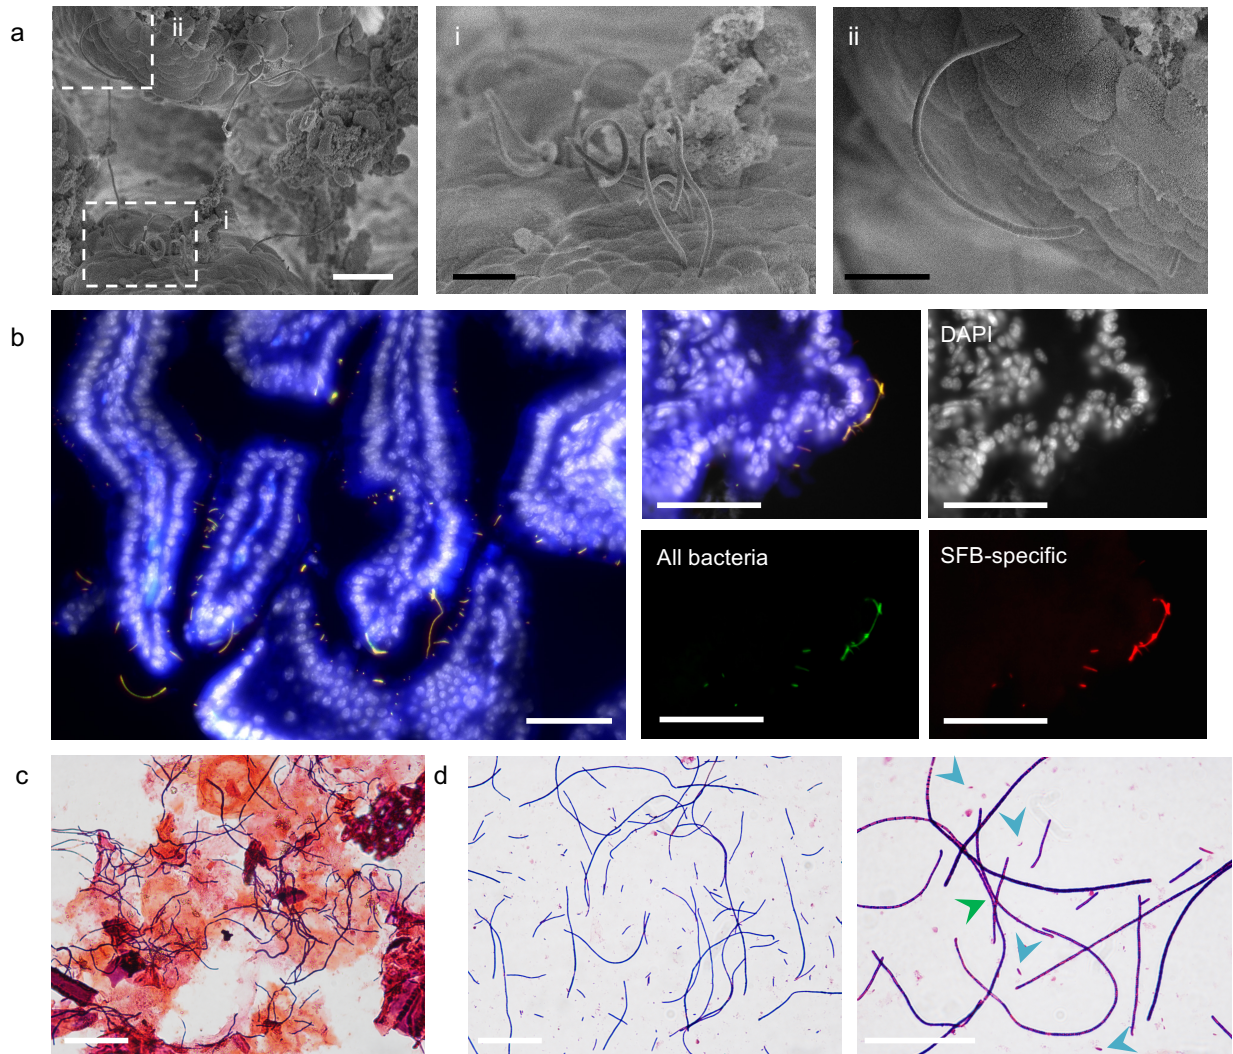

**Supplementary Figure 1: Mouse SFB monocolonization, purification and analysis.** **a.** Scanning EM and **(b)** fluorescence *in situ* hybridization, using SFB-specific and all bacterial 16S probes (autofluorescence of tissue in blue), of the terminal ileum of SFB-monocolonized mice. **c/d.** Gram stain of **(c)** fecal content and **(d)** after nycodenz purification. Green arrows highlight differentiating filaments; blue arrows highlight IOs. **(a-d)** Representative images from two **(a)**, three **(b)** and four **(c/d)** independent experiments with similar results and  $n=14$ ,  $n=11$ ,  $n=8$  and  $n=8$  images taken, respectively. Scale bars: black: 10 μm; white: 25 μm.

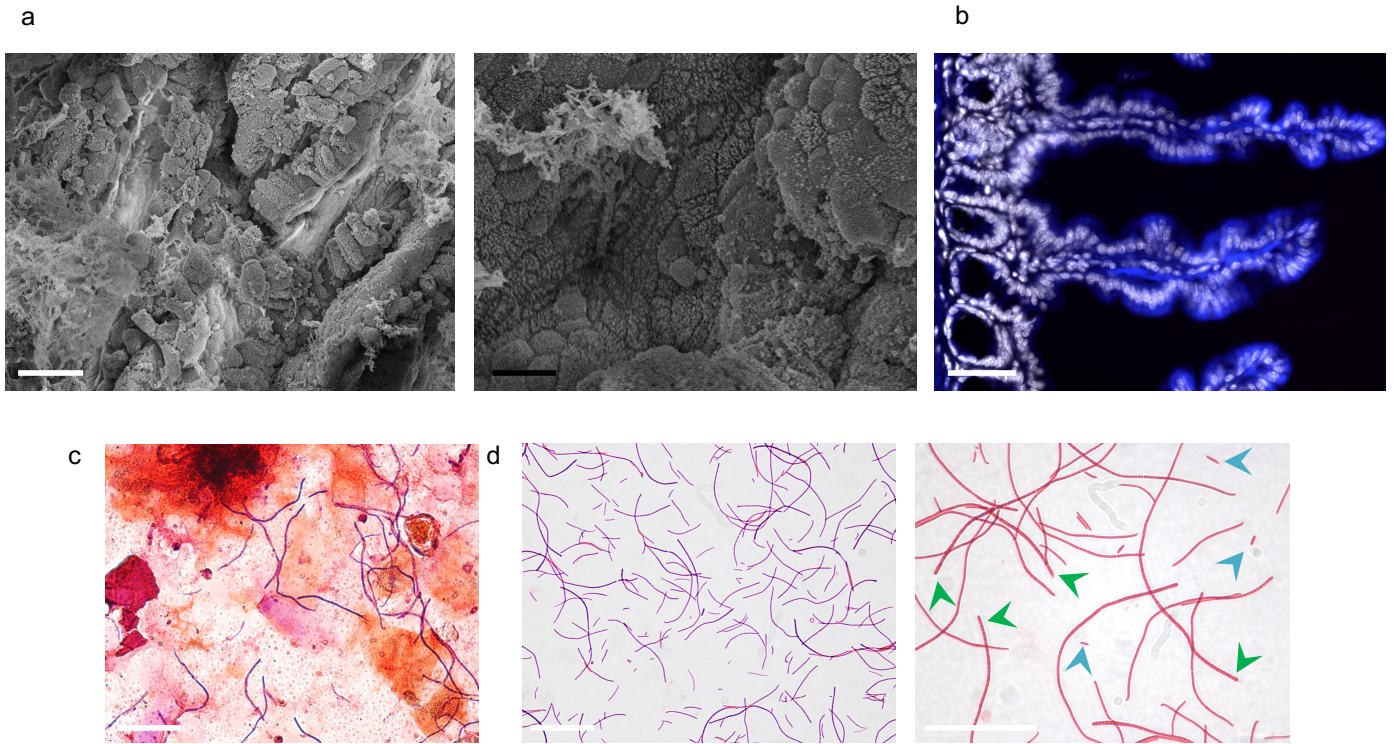

**Supplementary Figure 2: Rat SFB monocolonization, purification and analysis.** **a.** Scanning EM and **(b)** fluorescence *in situ* hybridization, using SFB-specific and all bacterial 16S probes (autofluorescence of tissue in blue), of the terminal ileum of SFB-monocolonized mice. Scale bar: 10 μm. **c/d.** Gram stain of **(c)** intestinal content and **(d)** after nycodenz purification. Green arrows highlight differentiating filaments; blue arrows highlight IOs. **(a-d)** Representative images from two **(a)** and three **(b-d)** independent experiments with similar results and n=10, n=12, n=8 and n=8 images taken, respectively. Scale bars: black: 10 μm; white: 25 μm.

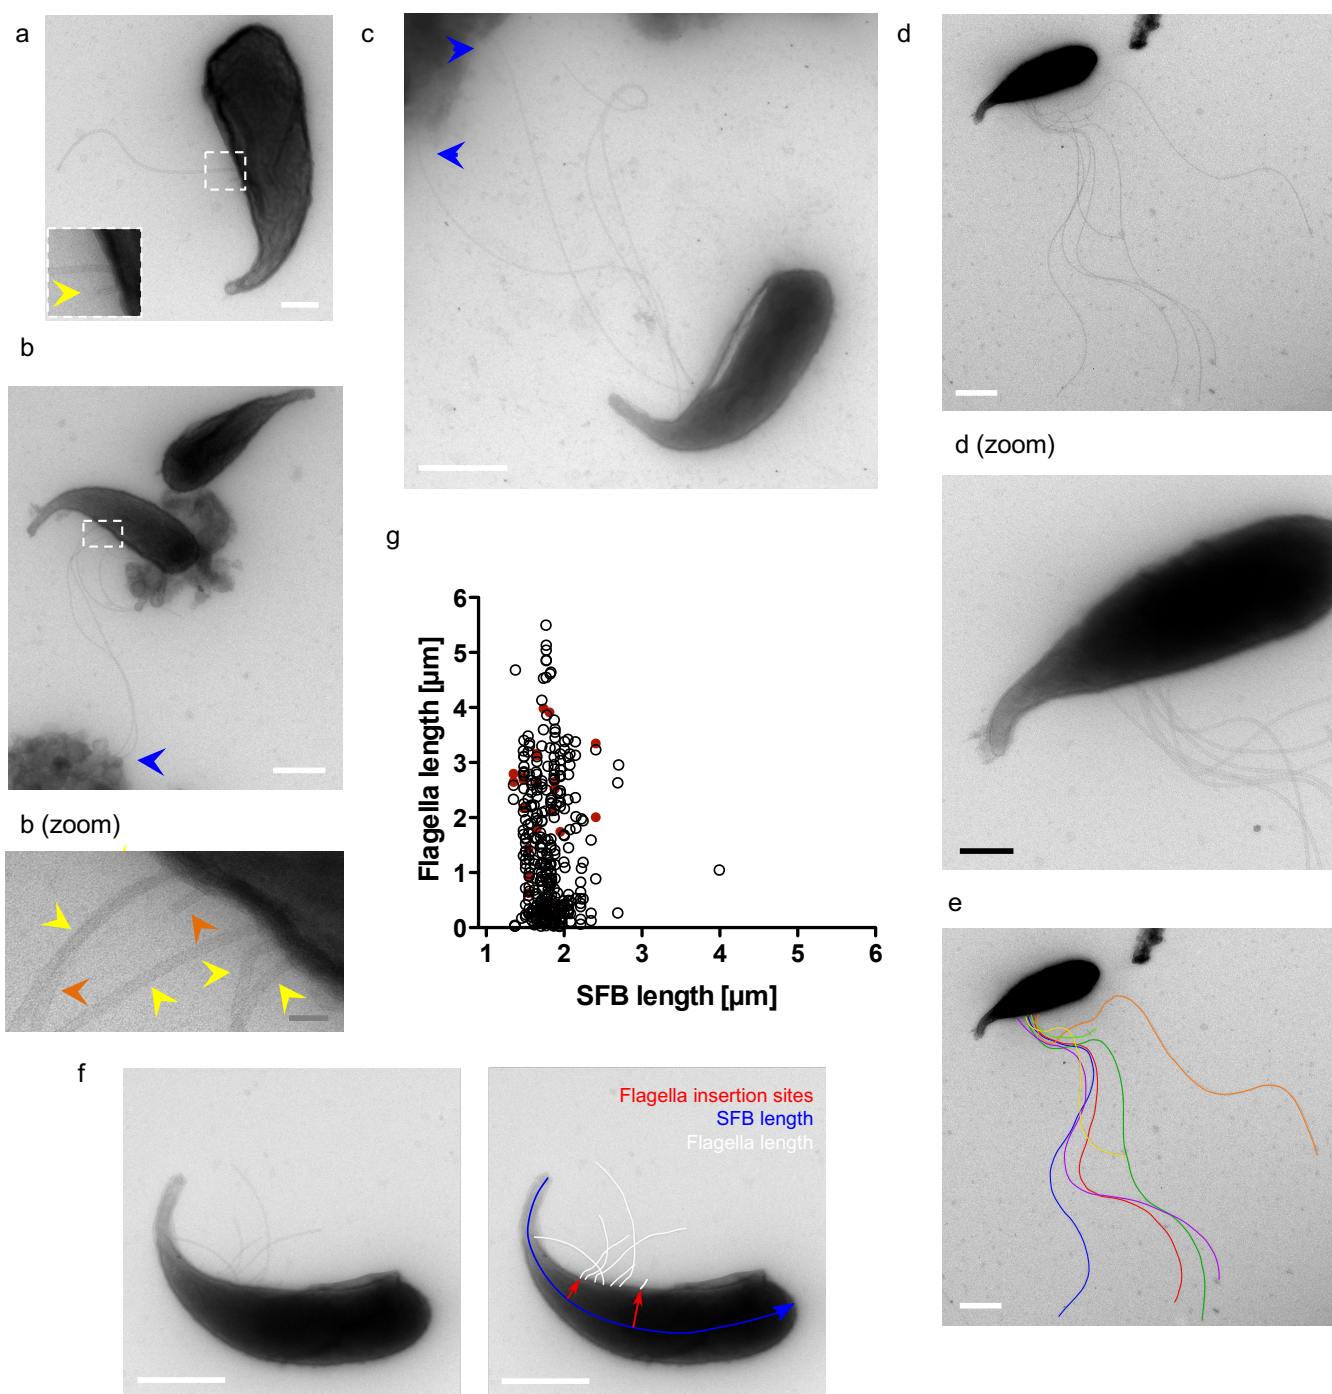

**Supplementary Figure 3: TEM of mouse SFB isolated from monocolonized mice. a-e.** Additional negative contrast stain TEM images of *in vivo*-grown mSFB with flagella. Yellow arrows highlight flagella; orange arrows highlight broken flagella; blue arrows highlight obstructed flagella. **e.** Image (d) with colored tracing of flagella for clarity. **f.** Schematic representation of the analysis of SFB for SFB length and flagella length and location. **g.** Analysis of flagella length compared to SFB length. Red circles denote obstructed flagella preventing full measurement. Scale bars: white: 500 nm; black 200 nm; grey: 50 nm. Representative mSFB TEM images are from four independent *in vivo* experiments with similar results (n=320, including 91 flagellated SFB).

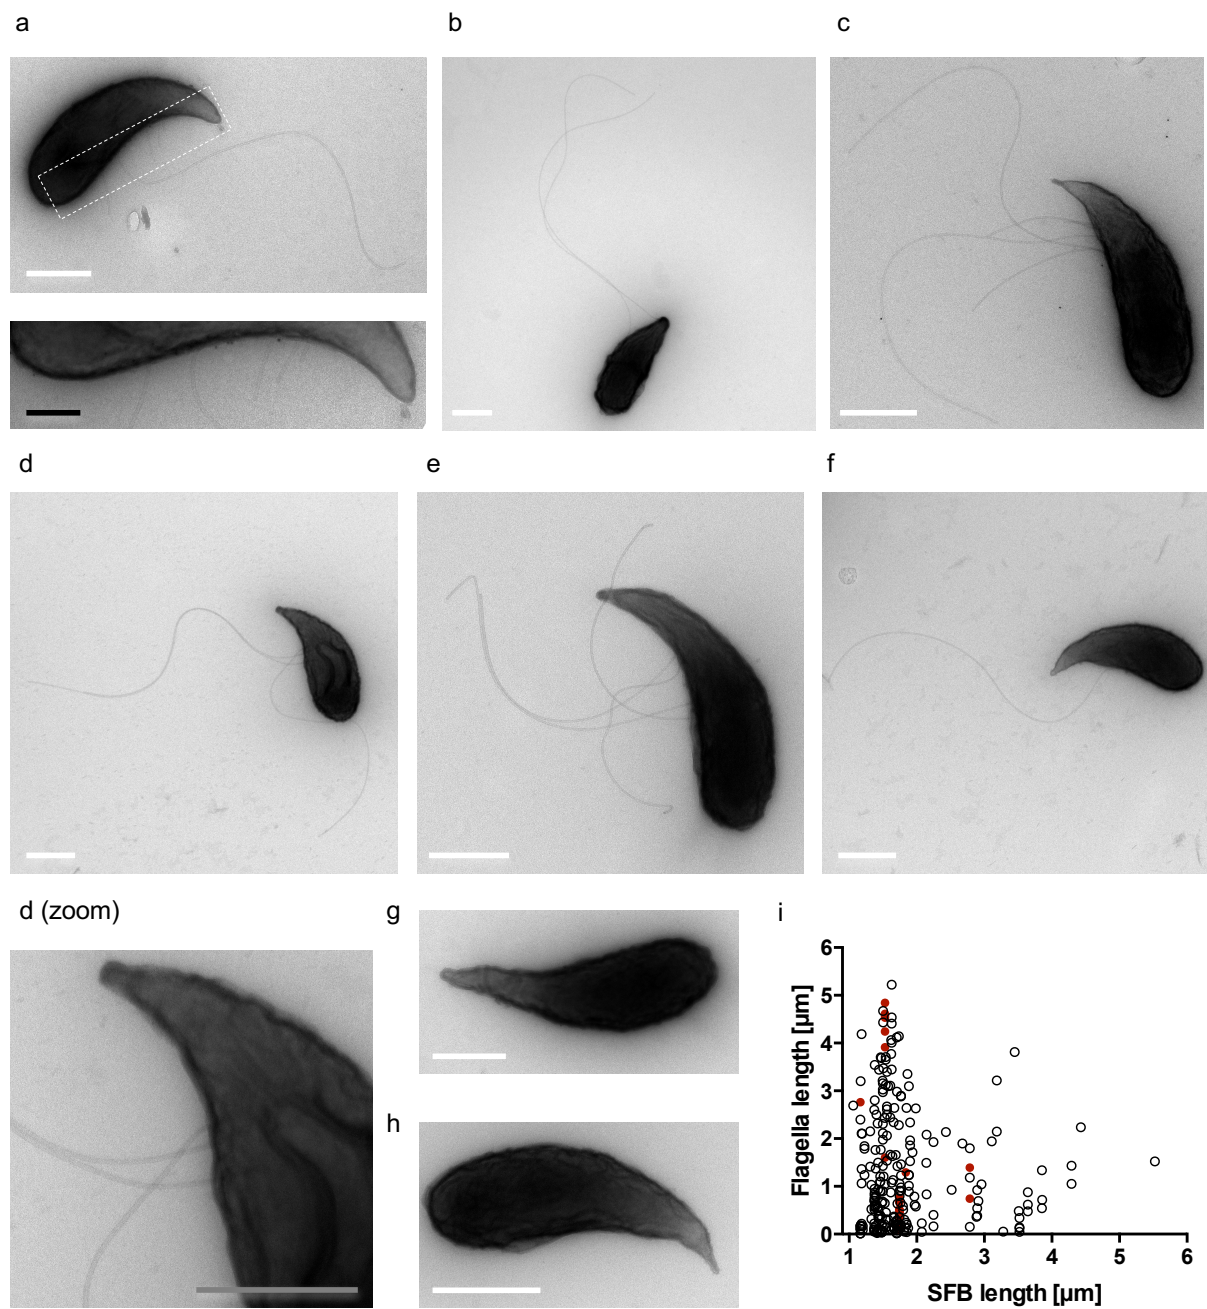

**Supplementary Figure 4: TEM of rat SFB isolated from monocolonized mice. a-h.** Additional TEM images of *in vivo*-grown rSFB with (a-f) and without (g/h) flagella. Representative rSFB TEM images are from three independent *in vivo* experiments with similar results (n=468, including 108 flagellated SFB). **i.** Analysis of flagella length compared to SFB length. Red circles denote obstructed flagella preventing full measurement. Scale bars: white: 500 nm; black or grey: 200 nm.

**mSFB grown *in vivo***

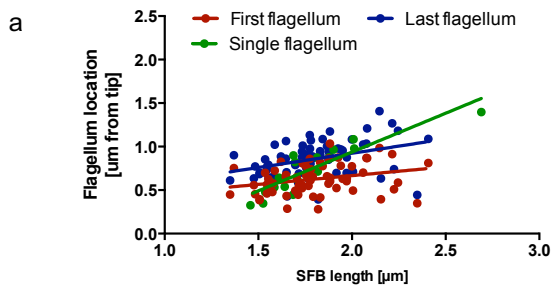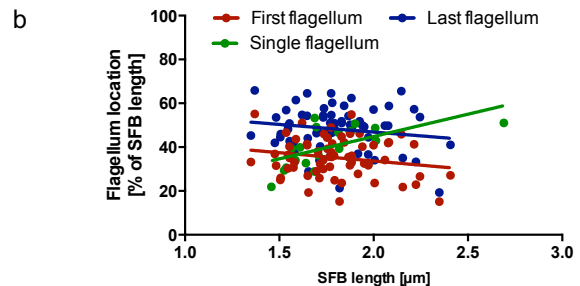

**rSFB grown *in vivo***

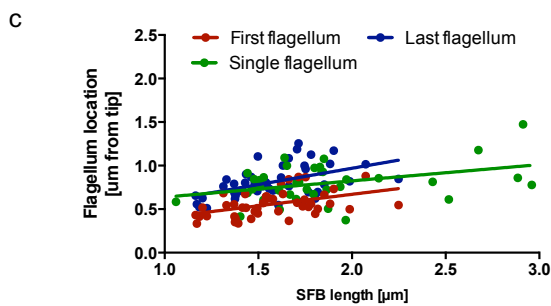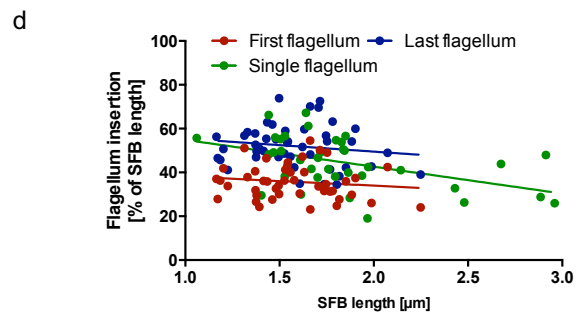

**mSFB grown *in vitro***

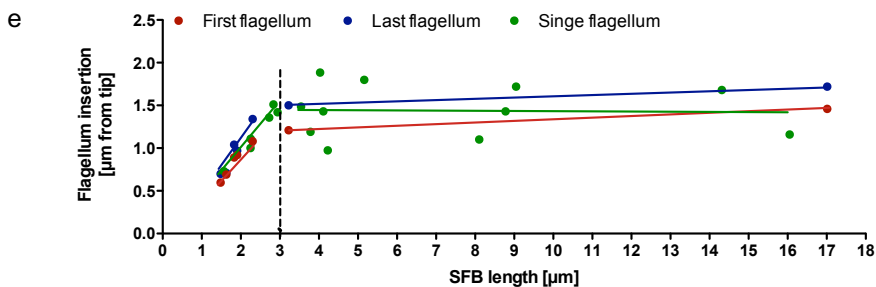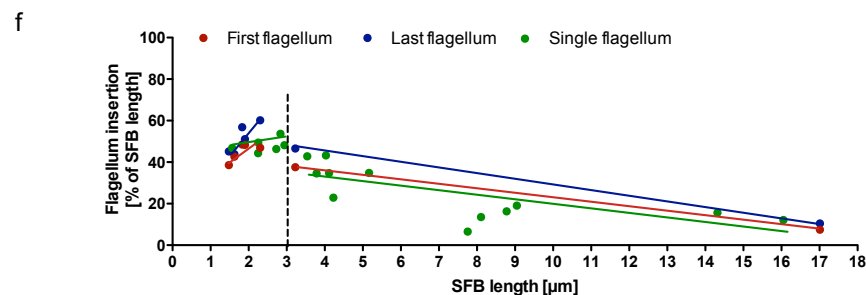

**Supplementary Figure 5: Analysis of SFB flagella location. a-f.** Distance of the single or first and last flagellum in terms of  $\mu\text{m}$  (a/c/e) and % (b/d/f) from the tip of *in vivo*-grown mSFB (a/b) or rSFB (c/d), and *in vitro*-grown mSFB (e/f). Linear regression curves are included for SFB from 1 to 3  $\mu\text{m}$  (a-f) and SFB from 3 to 17  $\mu\text{m}$  (e/f). Regression curves of (e) and (f) are shown as trend lines based on separate regression curve analysis for SFB up to and greater than 3  $\mu\text{m}$  in length. For SFB of 1 to 3  $\mu\text{m}$ , 82 bacteria were analyzed for *in vivo*-grown mSFB and rSFB and 11 bacteria were analyzed for *in vitro*-grown mSFB. An additional 14 bacteria between 3 to 17  $\mu\text{m}$  in length were analyzed for *in vitro*-grown mSFB.

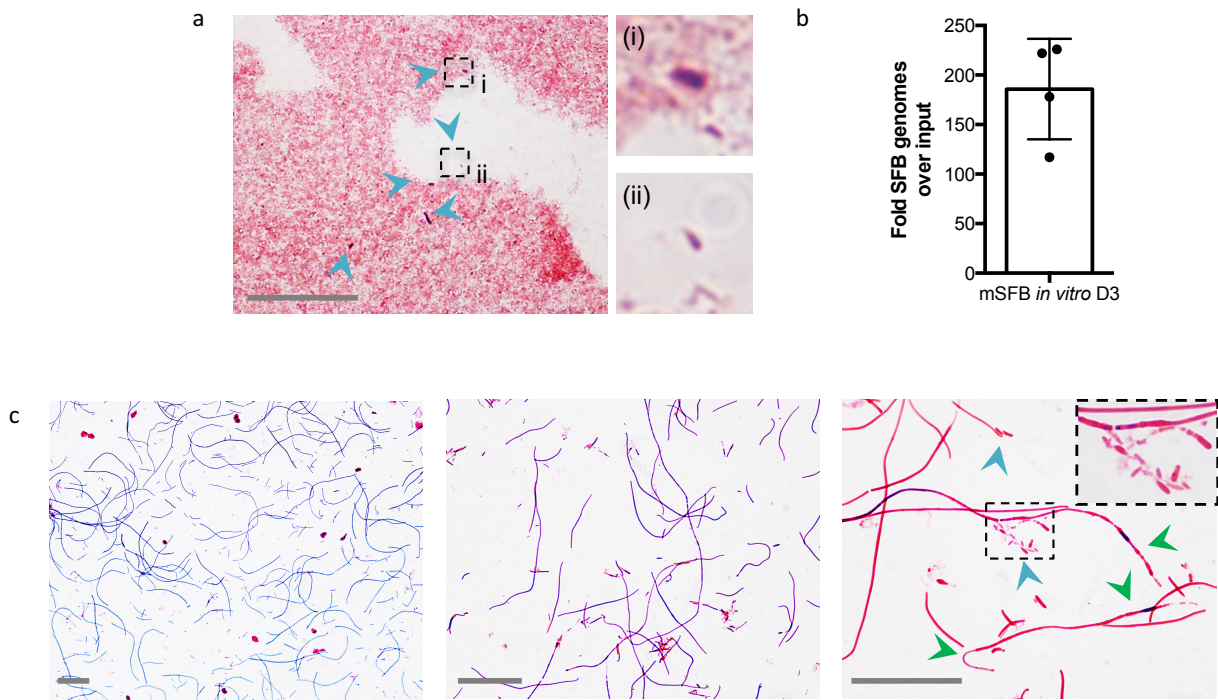

**Supplementary Figure 6: Mouse SFB *in vitro* growth.** **a.** Gram stain of purified IOs from monoclonalized mice used as input for *in vitro* growth. **b.** qPCR analysis of the fold increase in SFB genome number per transwell over input after three days of *in vitro* growth including mean with standard deviation. Values from one of three independent experiments with similar results. **c.** Purified SFB after 3 days of *in vitro* growth. Blue arrows highlight IOs; green arrows highlight differentiating filaments. Representative images (a/c, n=8 and 10, respectively) from four independent experiments with similar results. Scale bars: (a/c) 25  $\mu$ m.

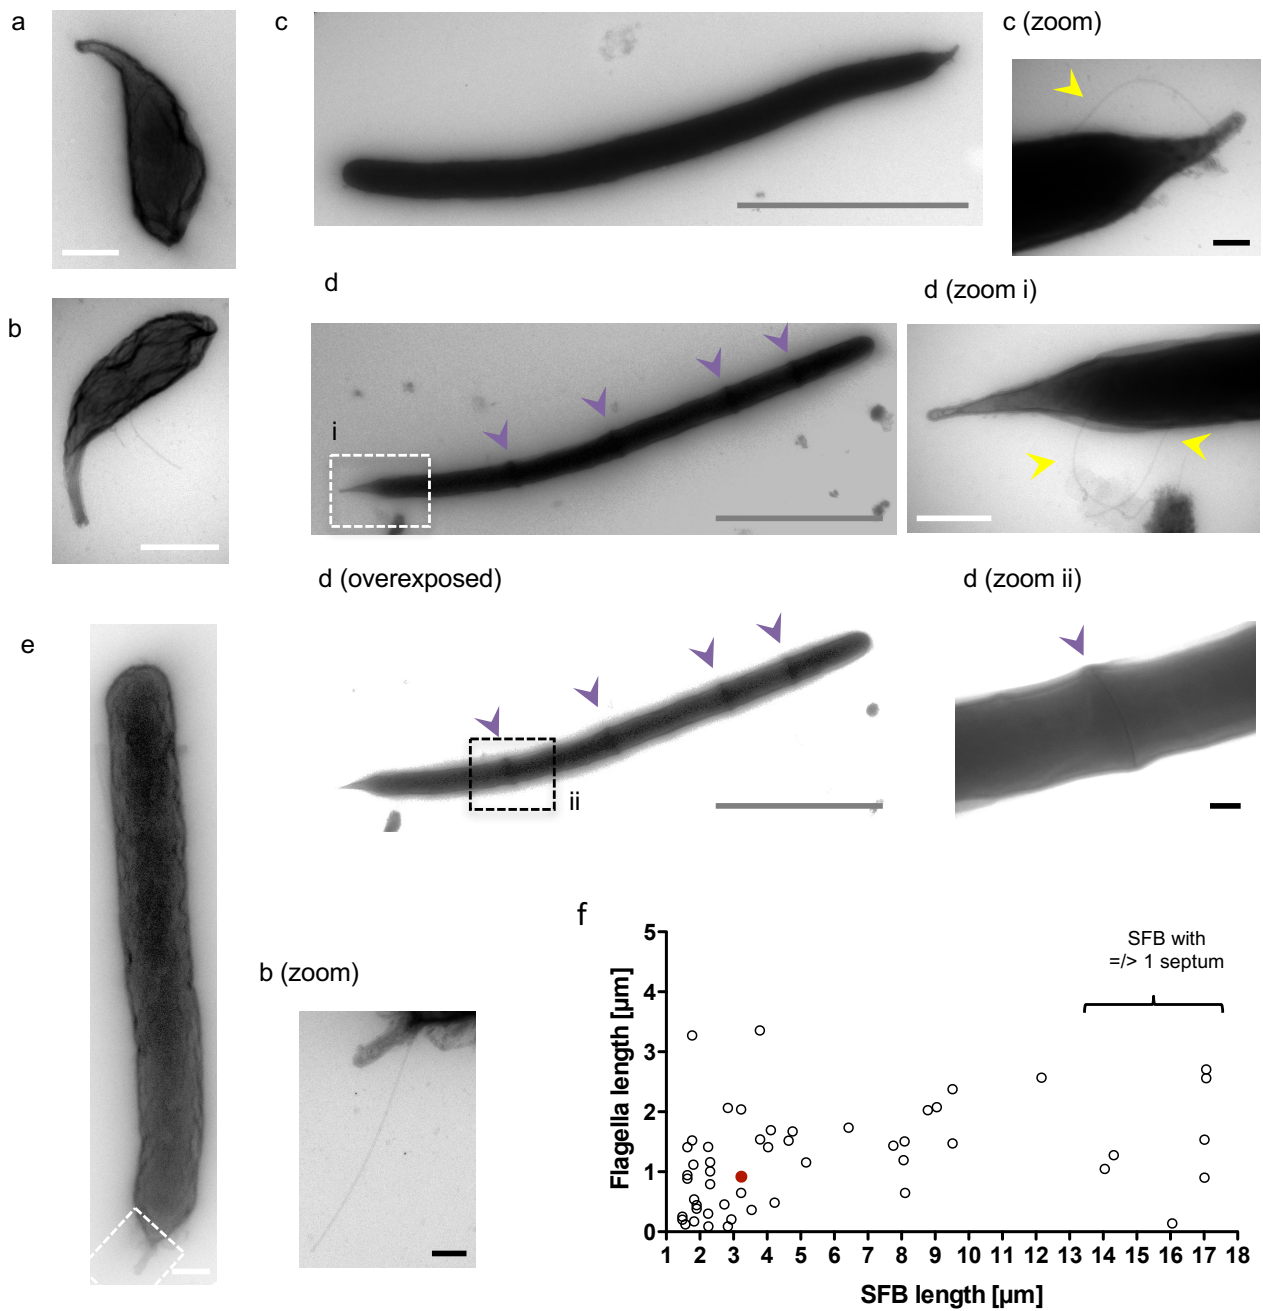

**Supplementary Figure 7: TEM of mouse SFB after 3 days of *in vitro* growth. a-e.** Additional TEM images of *in vitro*-grown mSFB without (a) and with (b-e) flagella. Yellow arrows highlight flagella; purple arrows highlight septa. Representative mSFB TEM images are from four independent *in vitro* experiments with similar results (n=278, including 38 flagellated SFB). **f.** Analysis of flagella length compared to SFB length. Red circle denotes obstructed flagellum preventing full measurement. Scale bars: white: 500 nm; black: 200 nm; grey: 5  $\mu\text{m}$ .



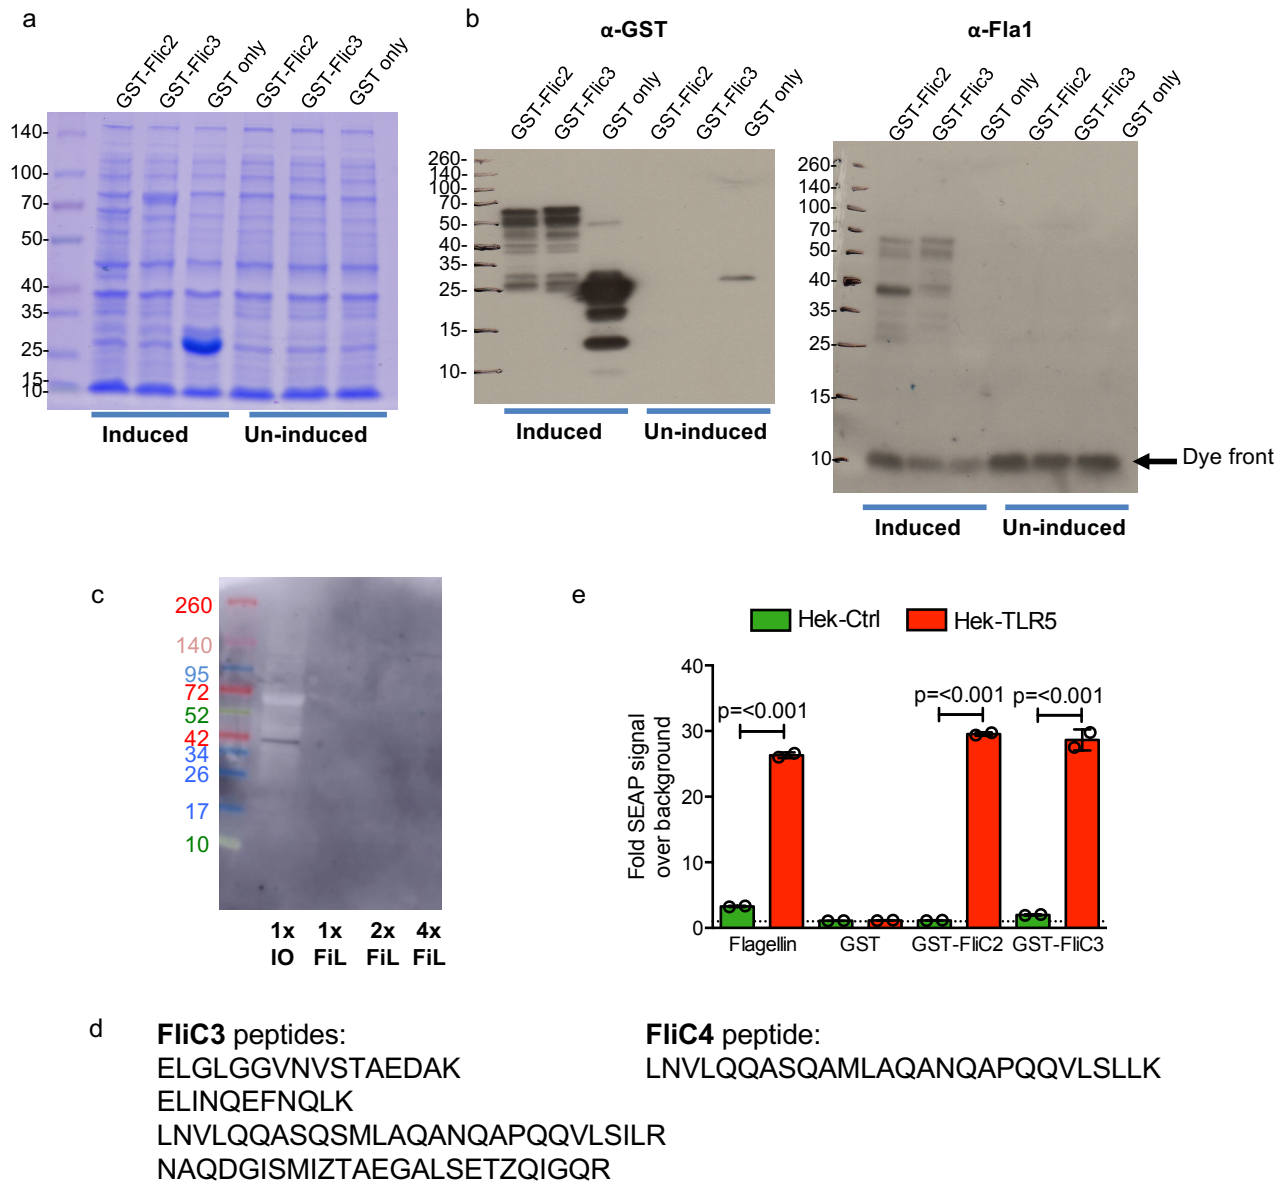

**Supplementary Figure 8: SFB flagellin detection by Western blot and TLR5 reporter cell lines. a/b.** Coomassie-stained SDS-page gel (a) and Western blot with anti-GST or anti-Fla1 antibody (b) of lysate from IPTG-induced and un-induced *E. coli* recombinantly expressing GST or GST translational fusions with SFB FliC2 or FliC3. **c.** Full length gel of anti-flagellin western blot of IO-only and filament-enriched (FIL) mSFB fractions from Figure 2e. “x” denotes fold increase in SFB numbers. (a-c) Representative images of two independent experiments with similar results. **d.** FliC peptides identified by mass spectrometry on the surface of mSFB from the IO-only fraction in two independent experiments with similar results. **e.** TLR5 stimulation by lysate from IPTG-induced *E. coli* recombinantly expressing GST alone or GST fused to SFB FliC2 or FliC3. Representative data of two independent experiments with similar results. Mean with standard deviation and two-sided t-test statistical analysis.

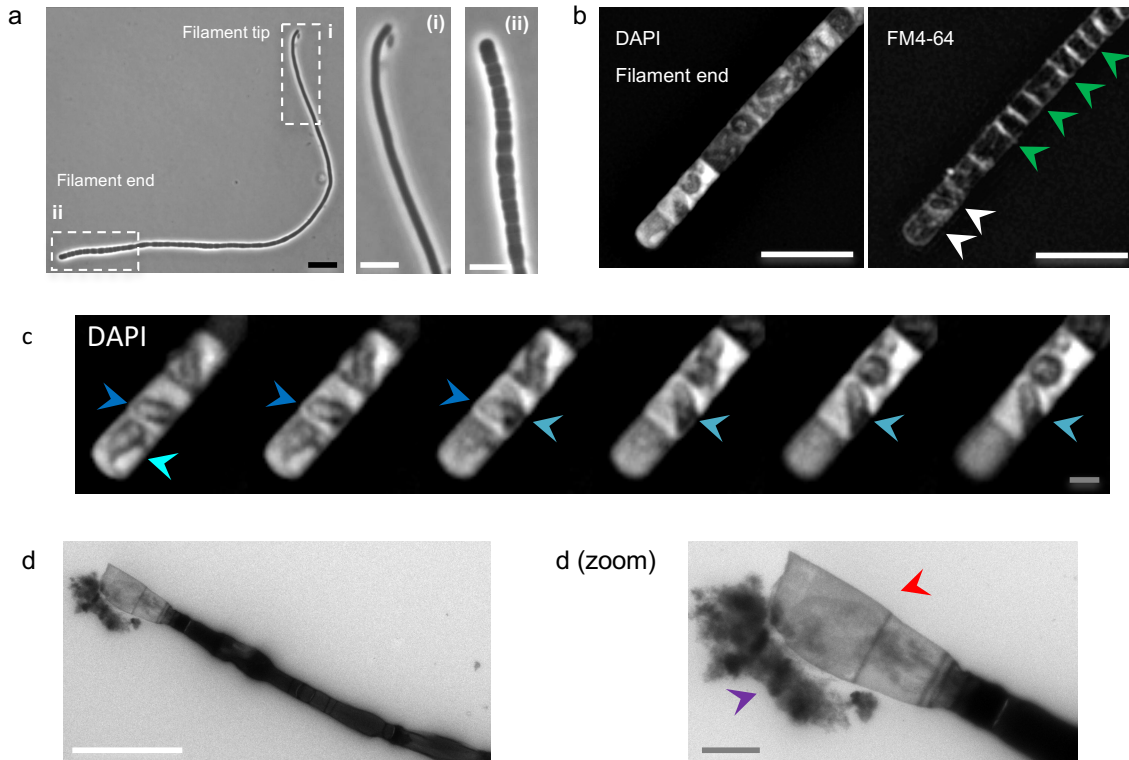

**Supplementary Figure 9: Stages of the SFB developmental life-cycle.** **a.** Bright field image of an *in vitro*-grown mSFB filament (n=5). **b.** Maximum intensity z-projection from a structured illumination image of an *in vivo*-grown mSFB filament end stained with DAPI and the membrane dye FM4-64FX (n=4). Green arrows highlight distinct septa dividing filament segments; white arrows highlight the absence of distinct septa staining. **c.** Montage of optical slices from DAPI-stained filament end of (b). Blue arrows highlight location of individual IOs within the filament. **d.** TEM image (n=3) of an *in vitro*-grown mSFB filament with an empty filament remnant (red arrow), and debris (purple arrow). Representative images from three (a) and two (b/d) independent experiments with similar results. Scale bars: black: 10  $\mu\text{m}$ ; white: 5  $\mu\text{m}$ ; grey: 1  $\mu\text{m}$ .

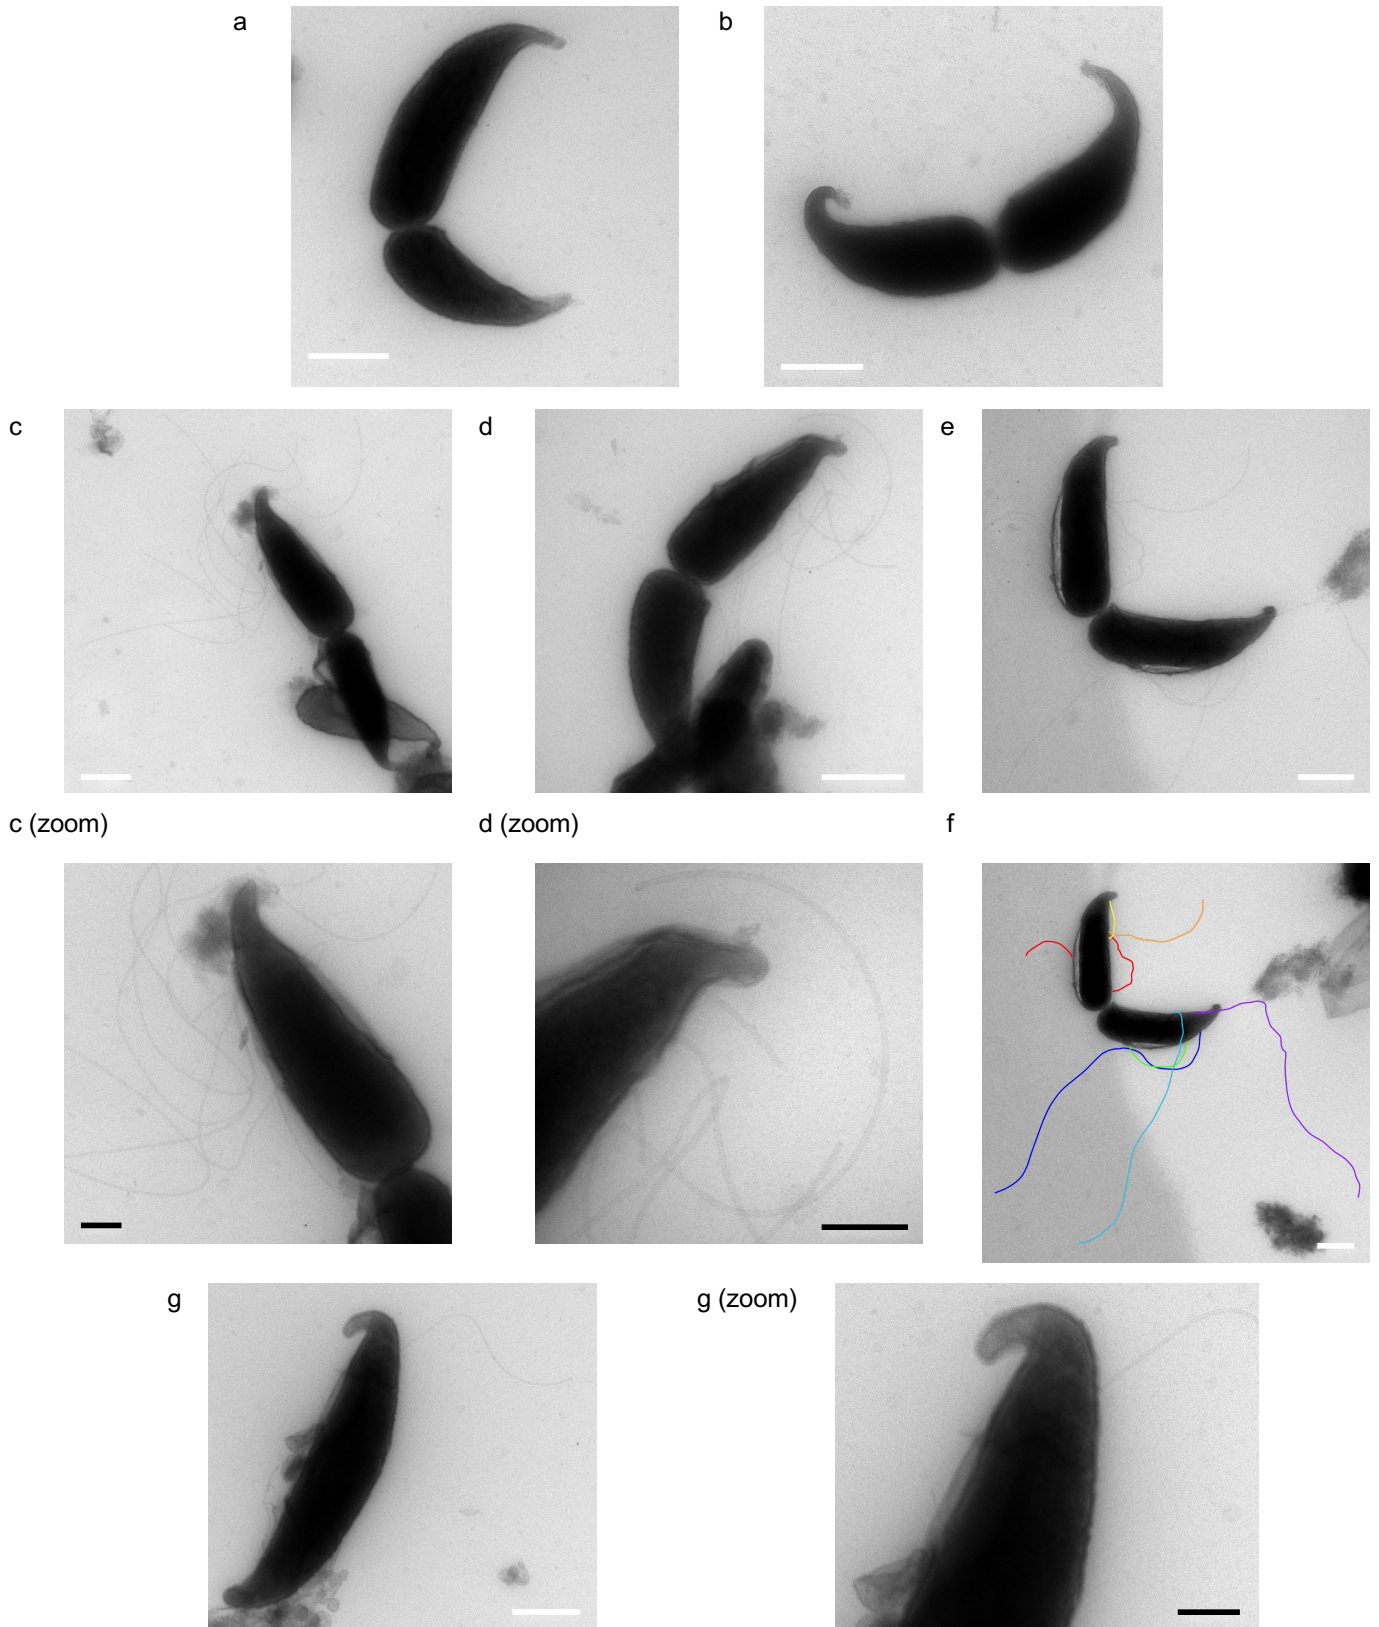

**Supplementary Figure 10: Additional TEM images of unseparated IOs from mouse SFB purified from monocolonized mice. a-g.** TEM images of *in vivo*-grown mSFB without (a/b) and with (c-g) flagella during IO development. Representative images from two independent experiments with similar results (n=13 non-separated IOs, including 8 with flagellation). (f) is a zoomed-out image of (e) with colored tracing of flagella. Scale bars: white: 500 nm; black: 200 nm.

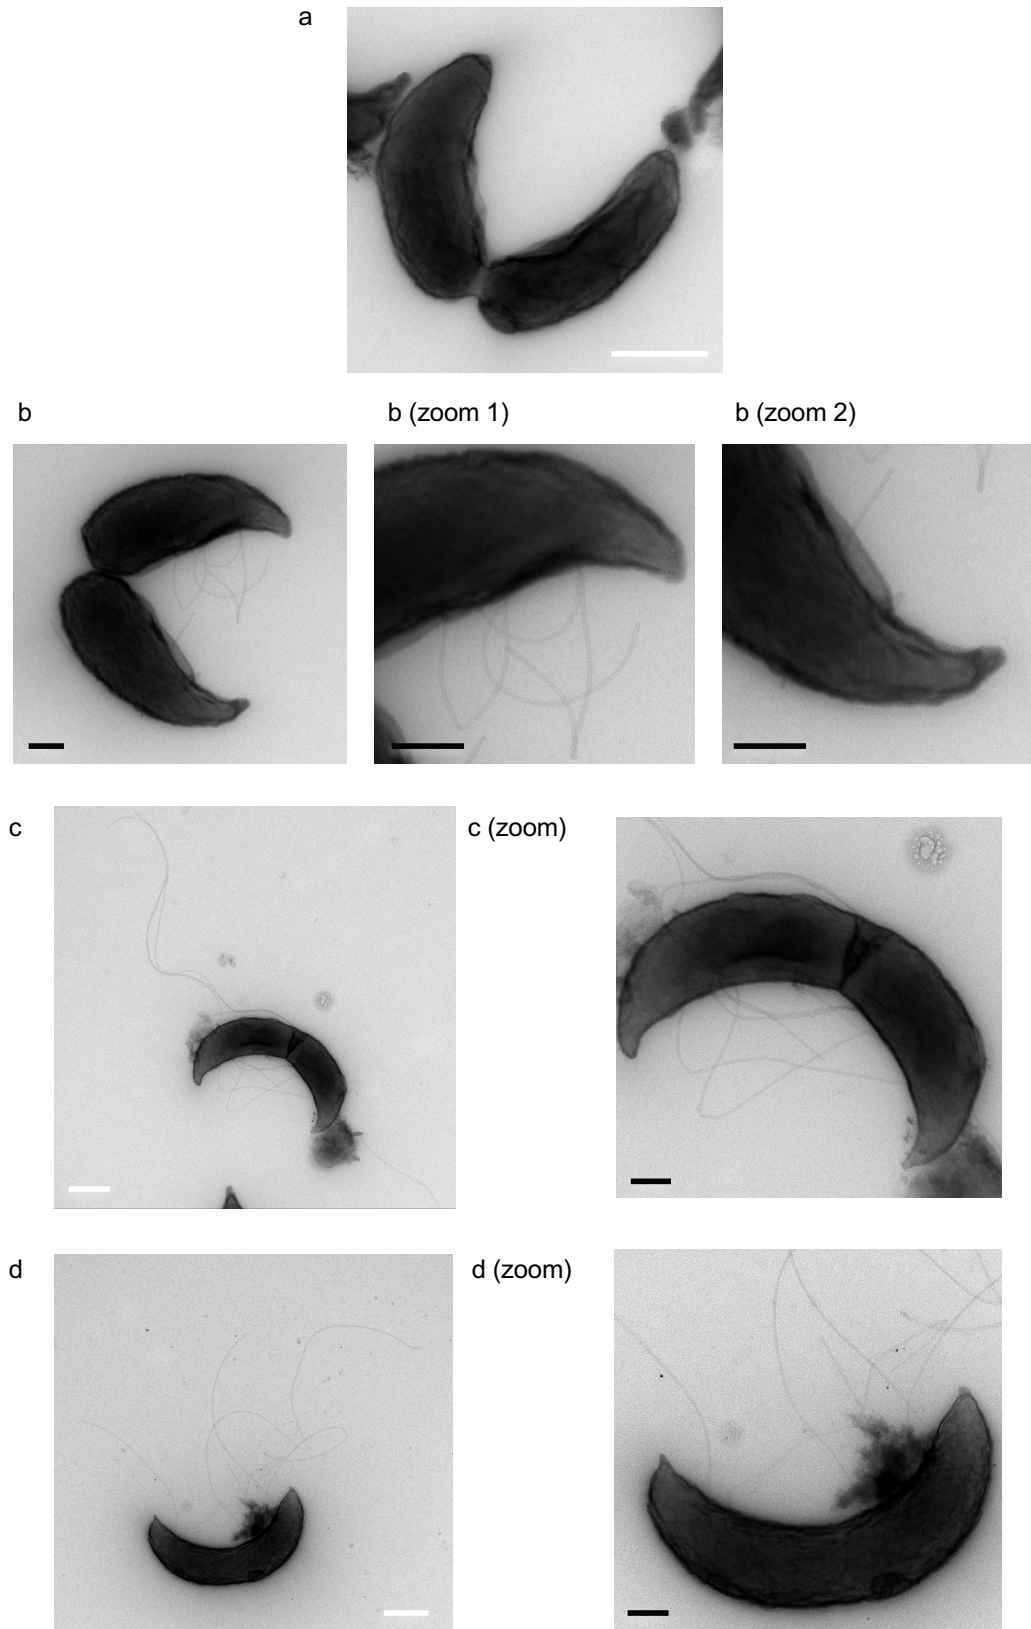

**Supplementary Figure 11: TEM images of unseparated IOs from rat SFB purified from monocolonized mice. a-d.** TEM images of *in vivo*-grown rSFB without (a) and with (b-d) flagella during IO development. Representative images from three independent experiments with similar results (n=8 non-separated IOs, including 4 with flagellation). Scale bars: white: 500 nm; black: 200  $\mu$ m.

**Supplementary Table 1: Linear regression curve analysis of SFB flagella location.** Linear regression curve analysis with p-values and R-squared values for the slope's deviation from zero of the flagella insertion locations of *in vivo* and *in vitro*-grown SFB of mouse and rat origin, as shown in Supplementary Figure 5. Flagella insertion locations were calculated in terms of  $\mu\text{m}$  and % of the total SFB length, starting from the pointed tip of the bacterium. For *in vivo*-grown SFB, only SFB of 1-3  $\mu\text{m}$  were analyzed, while for *in vitro*-grown mSFB, SFB of 1 to 3  $\mu\text{m}$  and 3 to 17  $\mu\text{m}$  were analyzed separately.

| Distance from tip | SFB origin, growth condition and length of SFB subset analyzed | p-value of regression curve<br>(# of images analyzed; R-squared value) |                       |                        |
|-------------------|----------------------------------------------------------------|------------------------------------------------------------------------|-----------------------|------------------------|
|                   |                                                                | First flagellum                                                        | Last flagellum        | Single flagellum       |
| in $\mu\text{m}$  | mSFB <i>in vivo</i> 1-3 $\mu\text{m}$                          | 0,0286<br>(64; 0,075)                                                  | 0,0023<br>(64; 0,140) | <0,0001<br>(18; 0,803) |
|                   | rSFB <i>in vivo</i> 1-3 $\mu\text{m}$                          | 0,0018<br>(45; 0,206)                                                  | 0,0006<br>(45; 0,242) | 0,0175<br>(37; 0,151)  |
| in %              | mSFB <i>in vivo</i> 1-3 $\mu\text{m}$                          | 0,1195<br>(64; 0,015)                                                  | 0,1993<br>(64; 0,003) | 0,0056<br>(18; 0,341)  |
|                   | rSFB <i>in vivo</i> 1-3 $\mu\text{m}$                          | 0,3901<br>(45; 0,003)                                                  | 0,3268<br>(45; 0,019) | 0,0035<br>(37; 0,203)  |
| in $\mu\text{m}$  | mSFB <i>in vitro</i> 1-3 $\mu\text{m}$                         | 0,0049<br>(5; 0,949)                                                   | 0,0060<br>(5; 0,942)  | 0,0008<br>(6; 0,953)   |
|                   | mSFB <i>in vitro</i> 3-17 $\mu\text{m}$                        | N/A (2)                                                                | N/A (2)               | 0,8731<br>(14; 0,002)  |
| in %              | mSFB <i>in vitro</i> 1-3 $\mu\text{m}$                         | 0,1707<br>(5; 0,518)                                                   | 0,0495<br>(5; 0,773)  | 0,4274<br>(6; 0,163)   |
|                   | mSFB <i>in vitro</i> 3-17 $\mu\text{m}$                        | N/A (2)                                                                | N/A (2)               | 0,0076<br>(14; 0,526)  |

**Supplementary Data: TEM Analysis Raw Data and Summary. File 1.** Summary of all TEM experiments performed and grouped per sample origin. Data analysis includes the number and percent of flagellated SFB imaged for bacteria of 1 to 2  $\mu\text{m}$  and 1 to 4  $\mu\text{m}$  in length. **Files 2-4.** The raw data of SFB length, flagella number and flagella length for *in vivo*-grown mSFB (File 2) and rSFB (File 3) and *in vitro*-grown mSFB (File 4). The *in vitro*-grown mSFB condition also includes the number of septa observed for flagellated SFB. **Files 5-7.** The subset of flagellated SFB used in the flagella insertion site analysis for *in vitro*-grown mSFB (File 5) and rSFB (File 6) and *in vitro*-grown mSFB (File 7), including insertion site measurements.

**Supplementary Data: Raw Figure Data.** Files containing the data graphed in Figures 1k, 1l, 2d, 2f, 2k and Supplementary Figures 3g, 4i, 5a-f, 6b, 7f and 8e using Prism® 5 (GraphPad) software. Files for figures with representative experiments (Figure 2k and Supplementary Figures 6b and 8e) also include data from other replicate experiments.
